# Supplementary material
Source: PubMed Central journal article supplement (PMC3842577)
Supplement: 97320630009912S1.pdf [file 97320630009912S1.pdf]

# BIOINFORMATION

Discovery at the interface of physical and biological sciences

open access

www.bioinformation.net

Hypothesis

Volume 9(18)

## Supplementary material:

Table 1: Genome properties of chosen Trypanosomatids

| Name of Trypanosomatids    | Number of Chromosomes | Genome Size (Mb) | Total number of CDS | Number of Analyzed CDS# | Number of Non analyzed CDS## | Overall G+C % in genome | G+C % in CDSs | Copy number of t-RNA gene | Number of t-RNA |
|----------------------------|-----------------------|------------------|---------------------|-------------------------|------------------------------|-------------------------|---------------|---------------------------|-----------------|
| <i>L.major</i> Friedlin    | 36                    | 32.82            | 8167                | 8102                    | 65                           | 59.72                   | 61.42         | 83                        | 45              |
| <i>L.infantum</i> JPCM5    | 36                    | 32.12            | 7994                | 7932                    | 62                           | 59.45                   | 61.45         | 66                        | 43              |
| <i>L.braziliensis</i> MHOM | 35                    | 37.28            | 7895                | 7834                    | 61                           | 57.59                   | 59.55         | 66                        | 44              |
| <i>T.brucei</i> 927        | 11                    | 26.08            | 8712                | 8663                    | 49                           | 46.43                   | 50.23         | 64                        | 44              |
| <i>T.cruzi</i> CL Brener   | 41                    | 89.61            | 9042                | 8990                    | 52                           | 56.93 <sup>@</sup>      | 52.46         | 115                       | 45              |

@-This value is very high as compared to *T.brucei* due to presence of very large number of N (Unidentified) nucleotides at the telomeric region; #-Less than ten thousand length; ##-More than ten thousand.

Table 2: Codon frequency table and the cognate copy number of t-RNA in Trypanosomatids

| Amino Acids (AA) | Symble of AA | Codons   | <i>L.major</i> Friedlin |       |      |                | <i>L.infantum</i> JPCM5 |       |      |                | <i>L.braziliensis</i> MHOM |       |      |                | <i>T.brucei</i> 927    |       |      |                | <i>T.cruzi</i> CL Brener |       |      |                |
|------------------|--------------|----------|-------------------------|-------|------|----------------|-------------------------|-------|------|----------------|----------------------------|-------|------|----------------|------------------------|-------|------|----------------|--------------------------|-------|------|----------------|
|                  |              |          | Frequency per thousand  | t-RNA | Case | Dominant Codon | Frequency per thousand  | t-RNA | Case | Dominant Codon | Frequency per thousand     | t-RNA | Case | Dominant Codon | Frequency per thousand | t-RNA | Case | Dominant Codon | Frequency per thousand   | t-RNA | Case | Dominant Codon |
| Phe              | F            | TTT/TTC  | 11.47/21                | 0/2   | 1a   | TTC            | 11.49/20.78             | 0/2   | 1a   | TTC            | 12.95/19.97                | 0/1   | 1a   | TTC            | 24.03/17.09            | 0/2   | 1a   | -              | 27.19/10.44              | 0/4   | 1a   | TTT            |
| Leu              | L            | TTA/TTG  | 1.7/10.78               | 2/1   | 2a   | CTC            | 1.72/10.68              | 1/1   | 2a   | CTC            | 2.6/11.47                  | 1/0   | 2a   | CTC            | 10.55/19.53            | 1/0   | 2a   | TTG            | 7.98/22.5                | 2/2   | 2a   | TTG            |
|                  |              | CTT/ CTC | 11.24/25.17             | 3/0   | 1b   | CTG            | 11.33/24.93             | 1/0   | 1b   | CTG            | 12.75/24.88                | 2/0   | 1b   | CTG            | 22.02/15.56            | 2/0   | 1b   | CIT            | 23.35/13.66              | 4/0   | 1b   | CTT            |
|                  |              | CTA/ CTG | 4.64/37.21              | 1/2   | -    |                | 4.66/36.38              | 1/2   | -    |                | 5.91/34.45                 | 1/2   | -    |                | 7.76/17.36             | 1/1   | 2a   |                | 5.11/23.63               | 2/2   | 2a   | CTG            |
| Ile              | I            | CTG/CTC  | 37.21/25.17             | 2/0   | 3a   |                | 36.38/24.93             | 2/0   | 3a   |                | 34.45/24.88                | 2/0   | 3a   |                | 17.36/15.56            | 1/0   | 3a   |                | 23.63/13.66              | 2/0   | 3a   |                |
|                  |              | ATT/ ATC | 9.33/21.26              | 3/0   | 1b   | ATC            | 9.53/20.97              | 1/0   | 1b   | ATC            | 11.55/19.94                | 2/0   | 1b   | ATC            | 19.48/11.6             | 2/0   | 1b   | ATT            | 20.79/10.75              | 4/0   | 1b   | ATT            |
|                  |              | ATA/ATC  | 2.88/21.26              | 1/0   | 3c   |                | 2.89/20.97              | 1/0   | 3c   |                | 3.55/19.94                 | 1/0   | 3c   |                | 10.37/11.6             | 1/0   | 3c   |                | 6.59/10.75               | 3/0   | 3c   |                |
| Val              | V            | GTT/ GTC | 9/19.53                 | 2/0   | 1b   | GTG            | 8.9/19.53               | 3/0   | 1b   | GTG            | 10.05/18.51                | 2/0   | 1b   | GTG            | 22.82/11.4             | 2/0   | 1b   | GTG            | 19.04/12.73              | 2/0   | 1b   | GTG            |
|                  |              | GTA/ GTG | 5.61/38.57              | 1/2   | -    |                | 5.65/37.52              | 1/2   | -    |                | 7.39/36.98                 | 1/1   | 2a   |                | 12.36/28.05            | 1/1   | 2a   |                | 8.33/33.91               | 2/4   | 2a   |                |
|                  |              | GTT/GTG  | 9/38.57                 | 2/2   | 3b   |                | 8.9/37.52               | 3/2   | 3b   |                | 10.05/36.98                | 2/1   | 3b   |                | 22.82/28.05            | 2/1   | 3b   |                | 19.04/33.91              | 2/4   | -    |                |
| Ser              | S            | GTG/GTC  | 38.57/19.53             | 2/0   | 3a   |                | 37.52/19.53             | 2/0   | 3a   |                | 36.98/18.51                | 1/0   | 3a   |                | 28.05/11.4             | 1/0   | 3a   |                | 33.91/12.73              | 4/0   | 3a   |                |
|                  |              | TCT/ ICC | 9.5/15.57               | 1/0   | 1b   | AGC            | 9.6/15.66               | 1/0   | 1b   | AGC            | 10.57/15.26                | 1/0   | 1b   | AGC            | 12.82/12.69            | 1/0   | 1b   | -              | 13.92/14.01              | 2/0   | 1b   | -              |
|                  |              | TCA/ TCG | 6.56/19.42              | 1/1   | 2a   | TCG            | 6.67/19.29              | 1/1   | 2a   | TCG            | 8.4/17.48                  | 1/0   | 2a   | TCG            | 13.13/11.32            | 1/1   | -    |                | 12.21/12.69              | 2/2   | -    |                |
|                  |              | TCG/TCC  | 19.42/15.57             | 1/0   | 3a   |                | 19.29/15.66             | 1/0   | 3a   |                | 17.48/15.26                | 0/0   | -    |                | 11.32/12.69            | 1/0   | 3a   |                | 12.69/14.01              | 2/0   | 3a   |                |
|                  |              | AGT/ AGC | 6.8/23.34               | 0/2   | 1a   |                | 6.69/23.52              | 0/2   | 1a   |                | 8.44/22.11                 | 0/2   | 1a   |                | 14.2/12.96             | 0/2   | 1a   |                | 12.53/13.5               | 0/2   | 1a   |                |
| Pro              | P            | CCT/ CCC | 8.27/12.34              | 2/0   | 1b   | CCG            | 8.61/12.25              | 2/0   | 1b   | CCG            | 9.25/12.24                 | 1/0   | 1b   | CCG            | 11.51/11.91            | 1/0   | 1b   | -              | 10.17/10.55              | 2/0   | 1b   | -              |
|                  |              | CCA/ CCG | 9.61/24.36              | 1/2   | -    |                | 9.77/24.56              | 1/2   | -    |                | 11.68/20.88                | 1/2   | -    |                | 13.86/11.79            | 1/1   | -    |                | 13.75/14.82              | 2/2   | -    |                |

# BIOINFORMATION

open access

|     |   |         |             |     |    |     |             |             |     |     |             |     |             |     |             |     |    |             |             |     |    |             |     |
|-----|---|---------|-------------|-----|----|-----|-------------|-------------|-----|-----|-------------|-----|-------------|-----|-------------|-----|----|-------------|-------------|-----|----|-------------|-----|
| Thr | T | CCG/CCC | 24.36/12.34 | 2/0 | 3a |     | 24.56/12.3  | 2/0         | 3a  |     | 20.88/12.24 | 2/0 | 3a          |     | 11.79/11.91 | 1/0 | 3a |             | 14.82/10.55 | 2/0 | 3a |             |     |
|     |   | ACT/ACC | 6.6/17.5    | 3/0 | 1b | ACG |             | 6.73/17.19  | 0/0 | -   | ACG         |     | 8.88/17.79  | 0/0 | -           | ACG |    | 12.66/11.86 | 1/0         | 1b  |    | 9.92/11.68  | 2/0 |
| Ala | A | ACA/ACG | 9.8/24      | 1/2 | -  |     | 9.61/24.01  | 1/2         | -   |     | 11.83/21.66 | 1/2 | -           |     | 17.04/14.58 | 1/1 | -  |             | 16.29/19.74 | 2/2 | -  |             |     |
|     |   | ACG/ACC | 24/17.5     | 2/0 | 3a |     | 24.01/17.19 | 2/0         | 3a  |     | 21.66/17.79 | 2/0 | 3a          |     | 14.58/11.86 | 1/0 | 3a |             | 19.74/11.68 | 2/0 | 3a |             |     |
|     |   | GCT/GCC | 17.2/34.6   | 2/0 | 1b | GCG |             | 17.35/35.26 | 2/0 | 1b  | GCG         |     | 18.54/30.92 | 2/0 | 1b          | GCG |    | 19.71/17.62 | 2/0         | 1b  |    | 16.35/21.75 | 2/0 |
| Tyr | Y | GCA/GCG | 18.23/41.42 | 1/2 | -  |     | 18.56/41.31 | 1/0         | 2a  |     | 19.83/35.5  | 1/1 | 2a          |     | 21.92/19.94 | 1/2 | 2b |             | 21.33/27    | 1/2 | -  |             |     |
|     |   | GCT/GCG | 17.2/41.42  | 2/2 | 3b |     | 17.35/41.31 | 2/0         | 3b  |     | 18.54/35.5  | 2/1 | 3b          |     | 19.71/19.94 | 2/2 | -  |             | 16.35/27    | 2/2 | 3b |             |     |
| His | H | TAT/TAC | 4.44/22.27  | 0/3 | 1a | TAC | 4.43/22.15  | 0/1         | 1a  | TAC | 5.3/21.97   | 0/1 | 1a          | TAC | 12.34/14.64 | 0/2 | 1a |             | 9.4/14.65   | 0/2 | 1a | -           |     |
| Gln | Q | CAT/CAC | 6.32/20.37  | 0/2 | 1a | CAC | 6.46/20.27  | 0/2         | 1a  | CAC | 7.07/20.04  | 1/1 | 1b          | CAC | 11.79/13.61 | 0/1 | 1a |             | 12.24/12.79 | 0/4 | 1a | -           |     |
|     |   | CAA/CAG | 7.36/32.64  | 1/3 | -  | CAG | 7.56/32.49  | 1/3         | -   | CAG | 8.52/31.7   | 1/2 | 2a          | CAG | 16.71/19.93 | 1/2 | -  | -           | 14.7/22.9   | 1/4 | 2b | -           |     |
| Asn | N | AAT/AAC | 5.86/22.52  | 0/3 | 1a | AAC | 5.91/22.35  | 0/1         | 2a  | AAC | 7.45/22.1   | 0/3 | 2a          | AAC | 17.5/18.91  | 0/2 | 2a |             | 18.33/16.99 | 0/4 | 2a | -           |     |
| Lys | K | AAA/AAG | 6.14/33.91  | 1/3 | -  | AAG | 6.44/33.75  | 1/3         | -   | AAG | 7.37/33.1   | 1/3 | -           | AAG | 22.25/27.75 | 1/3 | 2b |             | 18.46/26.23 | 2/4 | -  | -           |     |
| Asp | D | GAT/GAC | 14.82/33.79 | 0/3 | 1a | GAC | 15/33.59    | 0/2         | 1a  | GAC | 15.98/31.99 | 0/4 | 1a          | GAC | 26.1/21.15  | 0/2 | 1a |             | 25.94/22.76 | 0/2 | 1a | -           |     |
| Glu | E | GAA/GAG | 11.43/49.18 | 1/2 | 2a | GAG | 11.78/49.11 | 1/1         | 2a  | GAC | 12.87/47.87 | 1/2 | 2a          | GAC | 30.07/35.64 | 1/2 | 2b |             | 28.73/43.15 | 2/4 | -  | -           |     |
| Cys | C | TGT/TGC | 4.28/15.48  | 0/1 | 1a | TGC | 4.1/15.46   | 0/1         | 1a  | TGC | 5.17/14.55  | 0/1 | 1a          | TGC | 11.97/11.82 | 0/2 | 1a |             | 9.33/11.11  | 0/2 | 1a | -           |     |
| Arg | R | CGT/CGC | 10.74/32.98 | 4/0 | 1b | CGC | 10.64/33.33 | 4/0         | 1b  | CGC | 11.63/30.28 | 2/1 | 1b          | CGC | 15.81/15.75 | 3/0 | 1b | CGT         | 17.1/15.37  | 4/0 | 1b | CGT         |     |
| Gly | G | CGA/CGG | 6.89/12.74  | 1/1 | 2a |     | 7.25/12.83  | 1/1         | 2a  |     | 7.81/11.58  | 1/1 | 2a          |     | 9.08/12.34  | 1/1 | 2a |             | 9.84/12.93  | 2/2 | -  |             |     |
|     |   | AGA/AGG | 2.49/5.27   | 1/1 | -  |     | 2.64/5.33   | 1/1         | -   |     | 3.12/5.97   | 1/1 | -           |     | 7.1/10.21   | 1/1 | -  |             | 6.22/9.4    | 2/2 | -  |             |     |
|     |   | GGT/GGC | 12.6/33.79  | 0/4 | 1b | GGC | 12.13/34.25 | 0/2         | 1b  | GGC | 13.95/29.78 | 0/1 | 1b          | GGC | 21.59/14.69 | 0/3 | 1b | GCT         | 17.15/19.65 | 0/4 | 1b | -           |     |
| Met | M | GGA/GGG | 6.27/11.3   | 1/1 | -  |     | 6.51/11.26  | 1/1         | -   |     | 7.29/11.57  | 1/1 | -           |     | 15.36/14.06 | 1/1 | -  |             | 14.15/15.53 | 2/2 | -  |             |     |
| Trp | W | ATG     | 25.36       | 4   | -  |     | 25.22       | 4           | -   |     | 25.53       | 5   | -           |     | 25.05       | 3   | -  |             | 25.03       | 6   | -  |             |     |
|     |   | TGG     | 11.32       | 1   | -  |     | 11.22       | 1           | -   |     | 11.41       | 1   | -           |     | 11.57       | 1   | -  |             | 11.7        | 2   | -  |             |     |

1a: T ending codon encoded by the t-RNA of C ending codon (pyrimidine - pyrimidine); 1b: C ending codon encoded by the t-RNA of T ending codon (pyrimidine - pyrimidine); 2a: G ending codon encoded by the t-RNA of A ending codon (purine - purine); 2b: A ending codon encoded by the t-RNA of G ending codon (purine - purine); 3a: C ending codon encoded by the t-RNA of G ending codon (purine - pyrimidine); 3b: G ending codon encoded by the t-RNA of T ending codon (pyrimidine - purine); 3c: C ending codon encoded by the t-RNA of A ending codon (purine - pyrimidine)

**Table 3:** Table of amino acid frequency on the basis of their properties

|                     | Amino Acid Properties | <i>L.major</i> Friedlin | <i>L.infantum</i> JPCM5 | <i>L.braziliensis</i> MHOM | <i>T.brucei</i> 927 | <i>T.cruzi</i> CL Brenner |
|---------------------|-----------------------|-------------------------|-------------------------|----------------------------|---------------------|---------------------------|
| For all CDSs        | Hydrophobic           | 404.25                  | 402.46                  | 401.95                     | 392.77              | 393.22                    |
|                     | Hydrophilic           | 454.59                  | 455.7                   | 458.87                     | 464.96              | 470.56                    |
|                     | Special               | 138.3                   | 138.9                   | 136.36                     | 138.56              | 136.22                    |
| For essential Genes | Hydrophobic           | 420.35                  | 404.5                   | 401.1                      | 382.4               | 394.62                    |
|                     | Hydrophilic           | 446.67                  | 448.0                   | 461.79                     | 471.41              | 472.29                    |
|                     | Special               | 142.18                  | 145.08                  | 135.94                     | 139.75              | 131.13                    |

Hydrophobic - LMIVWAFY; Hydrophilic - DEKRHSTNQ; Special - GCP
